# Supplementary material for: Long non-coding RNAs identify a subset of luminal muscle-invasive bladder cancer patients with favorable prognosis
Source: Genome Med. 2019 Oct 17;11:60. doi: 10.1186/s13073-019-0669-z (PMC6796434; doi:10.1186/s13073-019-0669-z)
Supplement: Supplementary file 1 — Table S1: Final list of gene features and coefficients for the genomic classifier. Table S2: Concordance of our generated lncRNA clusters and the lncRNA clusters from the TCGA 2017 publication, in the TCGA cohort. Table S3: Intersection of the lncRNA-based consensus clusters and the TCGA2017 mRNA subtypes for the NAC and TCGA cohorts. Table S4: Mutation status enrichment for LPL-C3 vs other in TCGA cohort. Table S5: Fusion event enrichment for LPL-C3 vs other in TCGA cohort. Table S6: Intersection of the GC FGFR3+ tumors and the TCGA2017 mRNA subtypes for the NAC, TCGA, UTSW and PCC cohorts. Table S7: Multivariable analyses in the NAC, TCGA and UTSW cohorts. Table S8: Intersection of the GC FGFR3+ tumors and the Consensus Classifier mRNA subtypes for the NAC, TCGA, UTSW and PCC cohorts. (XLSX 23 kb) [file 13073_2019_669_MOESM1_ESM.xlsx]

## Sheet: Table S1
Table S1: Final list of gene features and coefficients for the genomic classifier.
Genes in model	Coefficient
(Intercept)	-2.68823
COL6A3	-0.0485117
COL3A1, COL1A1, COL1A2	-0.0414506
CTD-2340E1.2	-0.142575
AF038458.3	-0.13759
BTG2	0.0653926
AGR2	0.068626
PTPN13	0.0367962
BEX4	0.0727619
ATP8B1, CAT, BHLHE41, PPDPF	0.283569
HPGD	0.0809992
ACOX1, SEMA5A	0.131461
ZNF626	0.116753
POF1B, BCAS1, SORL1	0.150082
CTD-2626G11.2	0.0708519
ZNF737	0.0733743
ADAM10, ADIRF	0.146369
UGT1A8, UGT1A3, UGT1A5, UGT1A1, UGT1A9	0.0929196
AQP3	0.0334253
AC017060.1, AC019117.2	0.0943509
SLITRK6	0.0715846
DHRS2	0.0575132
GPX2	0.0604479
SLC14A1	0.0619829
RP11-172F10.1	-0.0570415
RP11-473M20.16	-0.083464
SULF1	-0.0511767
SFRP4	-0.0445485
CHI3L1, GREM1, AEBP1, COL6A1	-0.11776
RP11-58K22.1	-0.176439
PDE10A, FGFR3, BMP5, SHH	0.38799
RP11-488L18.10	0.0687136
TMPRSS4, RP11-706O15.3, SNURF, SEMA6A, MECOM, PGAP1, FRY, PLCD3	0.296028
PHGR1	0.086443
AC019117.1	0.119938
HMGCS2	0.116108
TOX3, RNF128, TBX3	0.182285

## Sheet: Table S2
Table S2: Concordance of our generated lncRNA clusters and the lncRNA clusters from the TCGA 2017 publication, in the TCGA cohort.
			LncRNA clusters (739 lncRNAs)
			1	2	3	4
	TCGA 2017	2	82	2	14	3
	LncRNA clusters	4	5	132	2	9
		3	7	3	62	4
		1	4	4	10	62
	Cohen’s Kappa 0.774 p<0.001

## Sheet: Table S3
Table S3: Intersection of the lncRNA-based consensus clusters and the TCGA2017 mRNA subtypes for the NAC and TCGA cohorts.
		NAC				TCGA
		LC1	LC2	LC3	LC4	LC1	LC2	LC3	LC4
	Basal_Sq	17	39	2	15	1	115	1	24
	Luminal	0	0	1	0	19	0	3	3
	Luminal_Inf	0	2	1	3	19	13	9	36
	Lum-pap	46	8	47	21	50	4	74	14
	Neuronal	0	1	0	2	9	9	1	1
	Unknown	10	4	0	2	na	na	na	na
	Total	73	54	51	45	98	141	88	78

## Sheet: Table S4
Table S4: Mutation status enrichment for LPL-C3 vs other in TCGA cohort.
	gene	p.value	FDR.q
	FGFR3	1.55e-13	9.16e-12
	TP53	4.63e-10	1.37e-08
	RB1	4.95e-06	9.74e-05
	CDKN1A	0.00653568	0.0783649
	KMT2A	0.00745818	0.0783649
	SSH3	0.00796931	0.0783649
	STAG2	0.013897	0.117132
	SF3B1	0.0196234	0.144723
	ERCC2	0.0270448	0.170377
	KDM6A	0.0288774	0.170377
	TSC1	0.0634086	0.340101
	NFE2L2	0.097152	0.451786
	KRAS	0.099546	0.451786
	SPTAN1	0.110367	0.452623
	HRAS	0.131843	0.452623
	ARID1A	0.137334	0.452623
	HIST1H3B	0.138088	0.452623
	PTEN	0.138088	0.452623
	NRAS	0.164487	0.510777
	NUP93	0.215538	0.618001
	ACTB	0.219966	0.618001
	RXRA	0.277578	0.70416
	PARD3	0.281717	0.70416
	EP300	0.286438	0.70416
	ZNF773	0.301963	0.712633
	MB21D2	0.358582	0.763113
	TAF11	0.360452	0.763113
	RHOA	0.362155	0.763113
	ASXL1	0.412346	0.810947
	KLF5	0.412346	0.810947
	CDKN2A	0.44205	0.828638
	TMCO4	0.465549	0.828638
	KMT2D	0.476057	0.828638
	MBD1	0.47752	0.828638
	METTL3	0.527565	0.869223
	PIK3CA	0.53746	0.869223
	CUL1	0.54654	0.869223
	PSIP1	0.559839	0.869223
	ERBB3	0.672737	0.964582
	CREBBP	0.694056	0.964582
	HES1	0.697159	0.964582
	SF1	0.697159	0.964582
	GNA13	0.703001	0.964582
	KMT2C	0.740561	0.993025
	KANSL1	0.784882	1
	ZFP36L1	0.799963	1
	ERBB2	0.844529	1
	ASXL2	1	1
	ATM	1	1
	C3orf70	1	1
	CASP8	1	1
	ELF3	1	1
	FAT1	1	1
	FBXW7	1	1
	RBM10	1	1
	RHOB	1	1
	SPN	1	1
	USP28	1	1
	ZBTB7B	1	1

## Sheet: Table S5
Table S5: Fusion event enrichment for LPL-C3 vs other in TCGA cohort.
	gene	p.value	FDR.q
	FGFR3	0.00350824	0.0210495
	PTPN13	0.5897	1
	PPARG	0.697159	1
	ASIP	1	1
	RHOA	1	1
	TNFRSF21	1	1

## Sheet: Table S6
Table S6: Intersection of the GC FGFR3+ tumors and the TCGA2017 mRNA subtypes for the NAC, TCGA, UTSW and PCC cohorts.
		NAC cohort			TCGA cohort			UTSW cohort			PCC cohort
	GC result	FGFR3+	GC -	Total	FGFR3+	GC -	Total	FGFR3+	GC -	Total	FGFR3+	GC -	Total
	Basal_Sq	0	73	73	1	140	141	0	33	33	0	79	79
	Luminal	0	1	1	0	25	25	0	3	3	3	12	15
	Luminal_Inf	1	5	6	1	76	77	0	8	8	0	24	24
	Lum-pap	35	89	124	53	89	142	10	26	36	21	74	95
	Neuronal	0	3	3	0	20	20	0	5	5	0	12	12
	Unknown	0	16	15	na	na	na	0	9	9	0	30	30
	Total	36	187	223	55	350	405	10	84	94	24	231	255

## Sheet: Table S7
Table S7: Multivariable analyses in the NAC, TCGA and UTSW cohorts.
	NAC Cohort
	Variable	Unadjusted HR	p-value	Adjusted HR	p-value
	Age	1.02 (1.00-1.05)	0.027	1.03 (1.00-1.05)	0.037*
	Gender: Male	0.97 (0.60-1.56)	0.9	1.12 (0.64-1.95)	0.7
	>ypT2	6.59 (4.06-10.70)	p<0.001	5.09 (2.88-8.97)	p<0.001*
	pN1-3	3.79 (2.31-6.23)	p<0.001	2.45 (1.45-4.15)	p<0.001*
	FGFR3+	0.14 (0.03-0.57)	0.006	0.17 (0.04-0.70)	0.014*
	TCGA Cohort
	Variable	Unadjusted HR	p-value	Adjusted HR	p-value
	Age	1.04 (1.02-1.05)	p<0.001*	1.03 (1.02-1.05)	p<0.001*
	Gender: Male	0.88 (0.64-1.23)	0.478	0.87 (0.61-1.24)	0.432
	>pT2	2.08 (1.43-3.02)	p<0.001*	1.59 (1.05-2.41)	p<0.001*
	pN1-3	2.24 (1.63-3.07)	p<0.001*	1.85 (1.33-2.58)	0.028*
	FGFR3+	0.37 (0.19-0.73)	0.004*	0.44 (0.18-1.08)	0.072
	UTSW Cohort
	Variable	Unadjusted HR	p-value	Adjusted HR	p-value
	Age	1.03 (1.00-1.06)	0.083	1.03 (1.00-1.06)	0.086
	Gender: Male	0.68 (0.33-1.41)	0.3	0.72 (0.34-1.54)	0.402
	>pT2	2.35 (1.23-4.48)	0.010*	1.32 (0.62-2.79)	0.473
	pN1-3	2.50 (1.38-4.53)	0.002*	2.13 (1.08-4.21)	0.029*
	FGFR3+	0.12 (0.02-0.89)	0.038*	0.15 (0.02-1.10)	0.062

## Sheet: Table S8
Table S8: Intersection of the GC FGFR3+ tumors and the Consensus Classifier mRNA subtypes for the NAC, TCGA, UTSW and PCC cohorts.
		NAC Cohort			TCGA cohort			UTSW cohort			PCC cohort
	GC result	FGFR3+	GC -	Total	FGFR3+	GC -	Total	FGFR3+	GC -	Total	FGFR3+	GC -	Total
	Ba/Sq	0	84	84	0	151	151	0	42	42	0	116	116
	LumNS	2	17	19	1	20	21	1	9	10	7	25	32
	LumP	22	25	47	51	77	128	6	9	15	11	21	32
	LumU	11	45	56	2	51	53	3	7	10	5	31	36
	NE-Like	0	2	2	0	6	6	0	1	1	0	6	6
	Stroma-rich	1	14	15	0	45	45	0	16	16	1	32	33
	Total	36	187	223	55	350	405	10	84	94	24	231	255
